# Supplementary material for: Nitrate-driven anaerobic oxidation of ethane and butane by bacteria
Source: PubMed Central journal article supplement (PMC10811727; doi:10.1093/ismejo/wrad011), 2024-01-10
Supplement: supporting_information_wrad011.pdf [file supporting_information_wrad011.pdf]

1 **Nitrate-driven anaerobic oxidation of ethane and butane by**  
2 **bacteria**

3

4 Mengxiong Wu<sup>1,9</sup>, Jie Li<sup>1,9</sup>, Chun-Yu Lai<sup>1,7,9,\*</sup>, Andy O Leu<sup>2</sup>, Shengjie Sun<sup>3</sup>, Rui Gu<sup>1</sup>, Dirk V  
5 Erler<sup>4</sup>, Lian Liu<sup>5</sup>, Lin Li<sup>6</sup>, Gene W. Tyson<sup>2</sup>, Zhiguo Yuan<sup>1,8</sup>, Simon J. McIlroy<sup>2</sup>, Jianhua  
6 Guo<sup>1,\*</sup>

7

8 <sup>1</sup>Australian Centre for Water and Environmental Biotechnology, Faculty of Engineering,  
9 Architecture and Information Technology, The University of Queensland, St Lucia,  
10 Queensland 4072, Australia

11 <sup>2</sup>Centre for Microbiome Research, School of Biomedical Sciences, Queensland University of  
12 Technology (QUT), Translational Research Institute, Woolloongabba, Queensland, Australia

13 <sup>3</sup>Computational Science Program, The University of Texas at El Paso, El Paso, TX, USA

14 <sup>4</sup>Faculty of Science and Engineering, Southern Cross University, Lismore, New South Wales,  
15 Australia

16 <sup>5</sup>Metabolomics Australia (Queensland Node), Australian Institute for Bioengineering and  
17 Nanotechnology, The University of Queensland, St Lucia, QLD 4072, Australia

18 <sup>6</sup>Department of Physics, University of Texas at El Paso, El Paso, TX, USA

19 <sup>7</sup>College of Environmental and Resource Science, Zhejiang University, Hangzhou, 310058,  
20 China

21 <sup>8</sup>School of Energy and Environment, City University of Hong Kong, Hong Kong SAR, China

22 <sup>9</sup>These authors contributed equally: Mengxiong Wu, Jie Li, Chun-Yu Lai.

23 \*Corresponding author email: [laichunyu@zju.edu.cn](mailto:laichunyu@zju.edu.cn), [jianhua.guo@uq.edu.au](mailto:jianhua.guo@uq.edu.au)

24 Corresponding author address: Level 4 Gehrman Building (60), The University of  
25 Queensland, Brisbane Qld 4072 Australia.

## 26 **1. Supplementary Text**

### 27 **GC-MS operation**

28 The GC was installed with a J&W HP-PLOT Q PT column (Agilent, USA) using He as the  
29 carrier gas at a flow rate of 5.58 mL/min. The GC oven was programmed as follows: (1)  
30 samples from the ethane bioreactor: 2 min at 45 °C, ramp at 10 °C/min to 60 °C where it was  
31 held for 6 min. (2) samples from the butane bioreactor: 45 °C for 2 min, and then heated with  
32 a rate of 15 °C/min to 100 °C where it was hold for 7 min. Mass spectra were detected in the  
33 electron impact mode at 70 eV. The mass spectrometer was operated in Selected Ion  
34 Monitoring (SIM) mode to detect m/z signals at 30 and 32 Da (C<sub>2</sub>H<sub>6</sub>), 58 and 62 Da (C<sub>4</sub>H<sub>10</sub>),  
35 44 and 45 Da (CO<sub>2</sub>), 28, 29 and 30 Da (N<sub>2</sub>) with a dwell time of 100 ms for each signal. Data  
36 processing was performed using the Chemstation program (Agilent, Unite States).

37

### 38 **16S rRNA gene amplicon sequencing**

39 Every 2-3 months, 10 mL of biomass samples were taken from the enrichment bioreactors  
40 and pelleted by centrifugation (8,000 g for 10 min). DNA extraction was performed using the  
41 FastDNA SPIN for Soil kit (MP Biomedicals, USA) according to the manufacture's protocol.  
42 The 16S rRNA gene (V6 to V8 regions) amplicon sequencing was done using the universal  
43 primer set 926F (5'-AAACTYAAAKGAATTGACGG-3') and 1392R (5'-  
44 ACGGGCGGTGTGTRC-3') on a MiSeq system (Illumina, USA) at the Australian Centre  
45 for Ecogenomics (ACE, Brisbane, Australia). QIIME2 was used to process the sequencing  
46 results following the ACEPipe (<https://acepipe.readthedocs.io/en/latest/>).

47

### 48 **Short- and long-read metagenomic sequencing**

49 For short-read sequencing, total DNA was extracted using FastDNA SPIN for Soil kit (MP  
50 Biomedicals, USA) and quality controlled using Nanodrop spectrophotometer (Thermo  
51 Fisher Scientific, Wilmington, DE) and Qubit dsDNA HS Assay Kit. Libraries for short-read  
52 sequencing were prepared using Illumina Nextera XT DNA library preparation kit and  
53 sequenced on NextSeq 500 (Illumina, USA) platform at ACE.

54 To obtain Nanopore long reads, total DNA was extracted using Qiagen PowerSoil Pro kit  
55 (Qiagen, Germany). Quality of extractions was checked using Qubit 1x dsDNA HS Assay Kit  
56 on the Qubit Flex Fluorometer (Thermo Fisher Scientific, Wilmington, DE) and the QIAxcel

57 DNA High Resolution Kit on the QIAxcel Advanced system (Qiagen, Germany). Libraries  
58 were prepared and sequenced on PromethION (Oxford Nanopore Technologies, USA).

59

## 60 **Phylogenetic analysis of recovered Symbiobacteriia genomes**

61 *Genome tree.* Phylogenetic placement of the two recovered Symbiobacteriia genomes in  
62 current study was performed with the existing ‘*Ca. A. nitratireducens*’ MAG<sup>1</sup> and available  
63 Firmicutes genomes in GTDB r207<sup>2,3</sup> using 120 bacterial-specific conserved marker genes.  
64 Briefly, marker genes in genomes were identified using Prodigal 2.6<sup>4</sup> and aligned using  
65 HMMER 3.3<sup>5</sup>. Trees were inferred using FastTree 2.1.11<sup>6</sup> with WAG+GMMA models.  
66 Bootstrap of the constructed tree was performed using workflow ‘bootstrap’ from  
67 GenomeTreeTk v0.1.6 (<https://github.com/dparks1134/GenomeTreeTk>) with 100 times  
68 nonparametric bootstrapping. The tree was visualized using ARB 6.0.6<sup>7</sup> and further refined  
69 using Adobe Illustrator (Adobe, USA).

70 *AssA amino acid tree.* The different AssAs in ‘*Ca. A. nitroreducens*’ were aligned with  
71 reference AssA, BssA, MasD, PflD, IslA and HpdL protein sequences downloaded from  
72 Uniprot database using muscle 3.8.31<sup>8</sup>. We applied trimAI 1.4.1<sup>9</sup> to trim gaps in msa.  
73 FastTree 2.1.11<sup>6</sup> was used to infer the phylogenetic tree. Bootstrap value was calculated, and  
74 tree was visualized as per the genome tree construction.

75

## 76 **Metabolite extraction and detection**

77 For metabolite extractions, enrichment cultures (5 mL) collected from ethane and butane  
78 bioreactors were centrifuged at 10,000 rpm for 10 min (4 °C) to harvest the cells. The  
79 metabolites were extracted from pelleted cells as described previously<sup>1</sup>. The ethyl and butyl  
80 succinate standards (custom synthesized by Best of Chemicals, USA) and cell extracts were  
81 then processed and analysed using an ultra-high-sensitivity triple quadrupole GC/MS-  
82 TQ8050 system (Shimadzu, Japan). The three most abundant fragmentation ions were chosen  
83 to monitor, with Transient 1 used as quantifier and the other two as qualifiers (See  
84 Supplementary Table 9).

85

86

87 **2. Supplementary Tables**

88 **Supplementary Table 1.** Nitrogen and electron balances for the enrichment cultures capable  
 89 of coupling anaerobic ethane/butane oxidation to nitrate reduction in the batch tests.

| Nitrogen<br>and<br>electron<br>balance<br>(mmol/L) | C <sub>2</sub> H <sub>6</sub> /<br>C <sub>4</sub> H <sub>10</sub><br>oxidized | NO <sub>3</sub> <sup>-</sup><br>and<br>NO <sub>2</sub> <sup>-</sup><br>reduced | NH <sub>4</sub> <sup>+</sup><br>generated | N <sub>2</sub> -N<br>generated | Maximum<br>electrons<br>available<br>from<br>C <sub>2</sub> H <sub>6</sub> /C <sub>4</sub> H <sub>10</sub><br>oxidation | Electrons<br>required<br>for NO <sub>3</sub> <sup>-</sup><br>reduction<br>* | Nitrogen<br>balance <sup>†</sup> | Electron<br>balance <sup>‡</sup> |
|----------------------------------------------------|-------------------------------------------------------------------------------|--------------------------------------------------------------------------------|-------------------------------------------|--------------------------------|-------------------------------------------------------------------------------------------------------------------------|-----------------------------------------------------------------------------|----------------------------------|----------------------------------|
| Ethane<br>bioreactor                               | 0.94                                                                          | 1.85                                                                           | 0.63                                      | 1.44                           | 13.18                                                                                                                   | 12.24                                                                       | 0.90                             | 1.08                             |
|                                                    | 1.15                                                                          | 1.99                                                                           | 1.20                                      | 1.21                           | 16.05                                                                                                                   | 15.67                                                                       | 0.82                             | 1.02                             |
|                                                    | 1.02                                                                          | 2.11                                                                           | 1.01                                      | 1.12                           | 14.23                                                                                                                   | 13.73                                                                       | 0.99                             | 1.03                             |
| Butane<br>bioreactor                               | 0.49                                                                          | 1.74                                                                           | 0.96                                      | 0.73                           | 12.77                                                                                                                   | 11.31                                                                       | 1.03                             | 1.13                             |
|                                                    | 0.34                                                                          | 1.43                                                                           | 0.71                                      | 0.77                           | 8.84                                                                                                                    | 9.56                                                                        | 0.97                             | 0.92                             |
|                                                    | 0.36                                                                          | 1.71                                                                           | 0.74                                      | 0.69                           | 9.34                                                                                                                    | 9.41                                                                        | 1.19                             | 0.99                             |

90 \* Electrons required for NO<sub>3</sub><sup>-</sup> reduction = NH<sub>4</sub><sup>+</sup> generated × 8 + N<sub>2</sub>-N generated × 5.

91 † Nitrogen balance = (NO<sub>3</sub><sup>-</sup> reduced) / (NH<sub>4</sub><sup>+</sup> generated + N<sub>2</sub>-N generated).

92 ‡ Maximum electrons available from ethane (=C<sub>2</sub>H<sub>6</sub> oxidized × 14) or butane (=C<sub>4</sub>H<sub>10</sub> oxidized × 26) oxidation  
 93 divided by electrons required for NH<sub>4</sub><sup>+</sup> and N<sub>2</sub>-N production; theoretically higher than 1.0, due to a fraction of  
 94 carbon assimilated into biomass cells.

95 **Supplementary Table 2. Sequencing statistics of metagenomics and**  
 96 **metatranscriptomics.** Key features of the metagenome (Illumina short-read and Nanopore  
 97 long-read sequencing) and metatranscriptomic datasets generated for the C<sub>2</sub>H<sub>6</sub>- and C<sub>4</sub>H<sub>10</sub>-  
 98 fed enrichment cultures. Two samples were taken from the C<sub>2</sub>H<sub>6</sub>-fed bioreactors for short-  
 99 read sequencing, thus generating two datasets.

|                                          |                                  | C <sub>2</sub> H <sub>6</sub> -fed cultures | C <sub>4</sub> H <sub>10</sub> -fed cultures |                            |
|------------------------------------------|----------------------------------|---------------------------------------------|----------------------------------------------|----------------------------|
| <b>Metagenomic short read sequencing</b> | # trimmed reads                  | 99,139,736/102,953,198                      | 116,463,546                                  |                            |
|                                          | % Reads in metagenomic scaffolds | 94.1/94.5                                   | 96.5                                         |                            |
| <b>Long-read sequencing</b>              | # raw nanopore reads (million)   | 11.8                                        | 28.9                                         |                            |
|                                          | Maximum read length              | 310,518                                     | 658,543                                      |                            |
|                                          | N50                              | 4,440                                       | 544                                          |                            |
| <b>Hybrid assembly</b>                   | Assembled metagenome size (Mbp)  | 474.6                                       | 314.6                                        |                            |
|                                          | N50 (bp)                         | 22,096                                      | 100,544                                      |                            |
|                                          | Maximum scaffold (bp)            | 6,053,062                                   | 4,746,968                                    |                            |
|                                          | # scaffold                       | 100,732                                     | 22,756                                       |                            |
| <b>Metatranscriptome</b>                 | <b>Total Illumina reads</b>      | <b>Trimmed Reads</b>                        | <b>non_rRNA reads</b>                        | <b>mRNA mapped to MAGs</b> |
| C2-phase1-RNA                            | 125,039,398                      | 116,358,434                                 | 82,846,667                                   | 34,950,915                 |
| C2-phase2-RNA                            | 212,602,712                      | 194,685,456                                 | 137,965,946                                  | 71,243,694                 |
| C4-phase1-RNA                            | 68474852                         | 64,488,864                                  | 40,744,382                                   | 25,927,776                 |
| C4-phase2-RNA                            | 62856468                         | 59,114,204                                  | 37,435,066                                   | 23,625,080                 |

101 **Supplementary Table 3. Estimated abundance of each lineage recovered from C<sub>2</sub>H<sub>6</sub>-fed community.** Lineages with abundance over 1%  
 102 were shown in the table.

| <b>Bin ID</b> | <b>C2_ Phase1- DNA (%)</b> | <b>C2_ Phase2- DNA (%)</b> | <b>Classification</b>                                                                                                       |
|---------------|----------------------------|----------------------------|-----------------------------------------------------------------------------------------------------------------------------|
| C2_01         | 28.46                      | 26.34                      | d__Bacteria;p__Patescibacteria;c__4484-211;o__4484-211;f__;g__;s__                                                          |
| <b>C2_SYM</b> | <b>14.38</b>               | <b>15.55</b>               | <b>d__Bacteria;p__Firmicutes_E;c__Symbiobacteriia;o__;f__;g__;s__</b>                                                       |
| C2_02         | 10.75                      | 11.29                      | d__Bacteria;p__Armatimonadota;c__Fimbriimonadia;o__Fimbriimonadales;f__Fimbriimonadaceae;g__<br>_OLB18;s__OLB18 sp001567425 |
| C2_03         | 6.77                       | 7.56                       | d__Bacteria;p__Bacteroidota;c__Ignavibacteria;o__Ignavibacteriales;f__Melioribacteraceae;g__DSX<br>H01;s__                  |
| C2_04         | 3.23                       | 3.63                       | d__Bacteria;p__Chloroflexota;c__Anaerolineae;o__Promineofilales;f__Promineofilaceae;g__Promine<br>ofilum;s__                |
| C2_05         | 3.83                       | 3.30                       | d__Bacteria;p__Bacteroidota;c__Bacteroidia;o__Flavobacteriales;f__Vicingaceae;g__BCD5;s__BCD5<br>sp013112825                |
| C2_06         | 2.36                       | 2.74                       | d__Bacteria;p__Proteobacteria;c__Gammaproteobacteria;o__Burkholderiales;f__SG8-39;g__;s__                                   |
| C2_07         | 2.46                       | 2.45                       | d__Bacteria;p__Actinobacteriota;c__Acidimicrobiia;o__ATN3;f__ATN3;g__ATN3;s__                                               |
| C2_08         | 2.12                       | 1.94                       | d__Bacteria;p__Chloroflexota;c__Anaerolineae;o__Anaerolineales;f__EnvOPS12;g__UBA7227;s__U<br>BA7227 sp002473085            |

|       |      |      |                                                                                                                      |
|-------|------|------|----------------------------------------------------------------------------------------------------------------------|
| C2_09 | 1.91 | 1.67 | d__Bacteria;p__Patescibacteria;c__Microgenomatia;o__UBA1406;f__GWC2-37-13;g__GWC2-37-13;s__GWC2-37-13 sp002050095    |
| C2_10 | 1.51 | 1.48 | d__Bacteria;p__Bacteroidota;c__Ignavibacteria;o__Ignavibacteriales;f__Ignavibacteriaceae;g__IGN2;s__IGN2 sp013285405 |
| C2_11 | 1.19 | 1.37 | d__Bacteria;p__Chloroflexota;c__Anaerolineae;o__Anaerolineales;f__EnvOPS12;g__OLB14;s__                              |
| C2_12 | 1.06 | 1.28 | d__Bacteria;p__Acidobacteriota;c__Vicinamibacteria;o__Vicinamibacterales;f__Fen-181;g__s__                           |
| C2_13 | 1.26 | 1.10 | d__Bacteria;p__Bacteroidota;c__UBA10030;o__UBA10030;f__g__s__                                                        |

103

104 **Supplementary Table 4. Estimated abundance of each lineage recovered from C<sub>4</sub>H<sub>10</sub>-fed community.** Lineages with abundance over 1%  
 105 were shown in the table.

| Bin ID        | C4_DNA (%)   | Classification                                                                                                          |
|---------------|--------------|-------------------------------------------------------------------------------------------------------------------------|
| <b>C4_SYM</b> | <b>16.72</b> | <b>d__Bacteria;p__Firmicutes_E;c__Symbiobacteriia;o__f__g__s__</b>                                                      |
| C4_01         | 15.46        | d__Bacteria;p__Chloroflexota;c__Anaerolineae;o__Promineofilales;f__Promineofilaceae;g__JAAYYY01;s__JAAYYY01 sp012515125 |
| C4_02         | 15.39        | d__Bacteria;p__Planctomycetota;c__Phycisphaerae;o__Phycisphaerales;f__SM1A02;g__CAADGN01;s__CAADGN01 sp900696545        |
| C4_03         | 11.67        | d__Bacteria;p__Chloroflexota;c__Anaerolineae;o__Anaerolineales;f__Anaerolineaceae;g__Bellilinea;s__                     |
| C4_04         | 10.50        | d__Bacteria;p__Chloroflexota;c__Anaerolineae;o__Anaerolineales;f__EnvOPS12;g__UBA7227;s__UBA7227 sp002473085            |

|       |      |                                                                                                                                                 |
|-------|------|-------------------------------------------------------------------------------------------------------------------------------------------------|
| C4_05 | 6.63 | d__Bacteria;p__Proteobacteria;c__Alphaproteobacteria;o__Rhizobiales;f__Rhizobiaceae;g__Aquamicrobium_A;s__                                      |
| C4_06 | 3.95 | d__Bacteria;p__Chloroflexota;c__Anaerolineae;o__Anaerolineales;f__Anaerolineaceae;g__Bellilinea;s__                                             |
| C4_07 | 1.33 | d__Bacteria;p__Bacteroidota;c__Ignavibacteria;o__Ignavibacteriales;f__Ignavibacteriaceae;g__Ignavibacterium;s__<br>_Ignavibacterium sp900696555 |
| C4_08 | 1.25 | d__Bacteria;p__Proteobacteria;c__Gammaproteobacteria;o__Burkholderiales;f__Burkholderiaceae;g__QOAZ01;s__                                       |
| C4_09 | 1.23 | d__Bacteria;p__Patescibacteria;c__Microgenomatia;o__UBA1406;f__GWC2-37-13;g__GWC2-37-13;s__GWC2-<br>37-13 sp002050095                           |
| C4_10 | 1.16 | d__Bacteria;p__Proteobacteria;c__Alphaproteobacteria;o__Rhizobiales;f__Xanthobacteraceae;g__Palsa-892;s__                                       |
| C4_11 | 1.14 | d__Bacteria;p__Proteobacteria;c__Gammaproteobacteria;o__Burkholderiales;f__Burkholderiaceae;g__SCN-69-<br>89;s__SCN-69-89 sp001724855           |



107 **Supplementary Table 5. Calculated expression level of each genome in C<sub>2</sub>H<sub>6</sub>-fed**  
108 **bioreactor.** Genomes with expression level >1% in at least one phase were shown.

| <b>Bin ID</b> | <b>C2_Phase1-RNA (%)</b> | <b>C2_Phase2-RNA (%)</b> |
|---------------|--------------------------|--------------------------|
| C2_SYM        | 62.58                    | 60.35                    |
| C2_02         | 13.01                    | 9.92                     |
| C2_04         | 3.47                     | 4.29                     |
| C2_06         | 2.51                     | 2.58                     |
| C2_11         | 2.68                     | 3.81                     |
| C2_12         | 2.66                     | 2.94                     |
| C2_17         | 0.84                     | 1.04                     |
| C2_26         | 1.60                     | 1.77                     |

109 **Supplementary Table 6. Calculated expression level of each genome in C<sub>4</sub>H<sub>10</sub>-fed**  
110 **bioreactor.** Genomes with expression level >1% in at least one phase were shown.

| <b>Bin ID</b> | <b>C4_Phase1-RNA (%)</b> | <b>C4_Phase2-RNA (%)</b> |
|---------------|--------------------------|--------------------------|
| C4_SYM        | 84.70                    | 84.27                    |
| C4_01         | 2.89                     | 3.59                     |
| C4_02         | 5.09                     | 3.32                     |
| C4_03         | 1.34                     | 1.23                     |
| C4_04         | 2.45                     | 3.54                     |

111

112 **Supplementary Table 7.** Average amino acid identities (AAI) between different AssAs in  
 113 ‘*Ca. A. nitratireducens*’ genomes recovered from the ethane- (E), propane- (P) and butane-  
 114 fed (B) bioreactors. AAI values were calculated using Blastp.

| AAI            | B_AssA1 | B_AssA2 | B_AssA3 | E_AssA1 | E_AssA2 | E_AssA3 | P_AssA1 | P_AssA2 | P_AssA3 |
|----------------|---------|---------|---------|---------|---------|---------|---------|---------|---------|
| <b>B_AssA1</b> | -       | 89.66   | 61.95   | 100.00  | 90.96   | 90.73   | 100.00  | 93.10   | 90.74   |
| <b>B_AssA2</b> | 89.66   | -       | 91.43   | 89.66   | 95.93   | 97.81   | 89.66   | 95.94   | 97.81   |
| <b>B_AssA3</b> | 61.95   | 91.43   | -       | 61.95   | 96.91   | 100.00  | 61.95   | 96.24   | 100.00  |
| <b>E_AssA1</b> | 100.00  | 89.66   | 61.95   | -       | 90.96   | 90.73   | 100.00  | 93.10   | 90.73   |
| <b>E_AssA2</b> | 90.96   | 95.93   | 96.91   | 90.96   | -       | 96.60   | 90.96   | 100.00  | 96.60   |
| <b>E_AssA3</b> | 90.73   | 97.81   | 100.00  | 90.73   | 96.60   | -       | 90.73   | 96.24   | 100.00  |
| <b>P_AssA1</b> | 100.00  | 89.66   | 61.95   | 100.00  | 90.96   | 90.73   | -       | 93.10   | 90.74   |
| <b>P_AssA2</b> | 93.10   | 95.94   | 96.24   | 93.10   | 100.00  | 96.24   | 93.10   | -       | 96.24   |
| <b>P_AssA3</b> | 90.74   | 97.81   | 100.00  | 90.73   | 96.60   | 100.00  | 90.74   | 96.24   | -       |

115

116 **Supplementary Table 8.** Average nucleotide identities (ANI) between different AssAs in  
 117 ‘*Ca. A. nitratireducens*’ genomes recovered from the ethane- (E), propane- (P) and butane-  
 118 fed (B) bioreactors. ANI values were calculated using Blastn.

| AAI            | B_AssA1 | B_AssA2 | B_AssA3 | E_AssA1 | E_AssA2 | E_AssA3 | P_AssA1 | P_AssA2 | P_AssA3 |
|----------------|---------|---------|---------|---------|---------|---------|---------|---------|---------|
| <b>B_AssA1</b> | -       | 89.31   | 89.57   | 99.96   | 89.85   | 89.57   | 99.96   | 89.78   | 89.57   |
| <b>B_AssA2</b> | 89.31   | -       | 98.83   | 89.27   | 97.42   | 98.87   | 89.27   | 97.46   | 98.87   |
| <b>B_AssA3</b> | 89.57   | 98.83   | -       | 89.61   | 96.80   | 99.96   | 89.61   | 96.65   | 99.96   |
| <b>E_AssA1</b> | 99.96   | 89.27   | 89.61   | -       | 89.89   | 89.61   | 100.00  | 89.74   | 89.61   |
| <b>E_AssA2</b> | 89.85   | 97.43   | 96.80   | 89.89   | -       | 96.84   | 89.89   | 99.84   | 96.84   |
| <b>E_AssA3</b> | 89.57   | 98.87   | 99.96   | 89.61   | 96.84   | -       | 89.61   | 96.68   | 100.00  |
| <b>P_AssA1</b> | 99.96   | 89.27   | 89.61   | 100.00  | 89.89   | 89.61   | -       | 89.74   | 89.61   |
| <b>P_AssA2</b> | 89.78   | 97.47   | 96.65   | 89.74   | 99.84   | 96.69   | 89.74   | -       | 96.69   |
| <b>P_AssA3</b> | 89.57   | 98.87   | 99.96   | 89.61   | 96.84   | 100.00  | 89.61   | 96.68   | -       |

119

120

121

122

123 **Supplementary Table 9.** Optimized multiple reaction monitoring transitions and retention  
124 times for ethylsuccinate and butylsuccinate analysed by GC-MS/MS.

| Compound        | Retention time (min) | Transient 1 (m/z) | Collision Energy (V) | Transient 2 (m/z) | Collision Energy (V) | Transient 3 (m/z) | Collision Energy (V) |
|-----------------|----------------------|-------------------|----------------------|-------------------|----------------------|-------------------|----------------------|
| Ethyl succinate | 9.940                | 275.0>73.1        | 35                   | 217.0>55.1        | 10                   | 275.0>147.2       | 10                   |
| Butyl succinate | 12.245               | 303.0>147.1       | 10                   | 147.1>73.1        | 30                   | 231.0>69          | 10                   |

125

126 **3. Supplementary Figures**

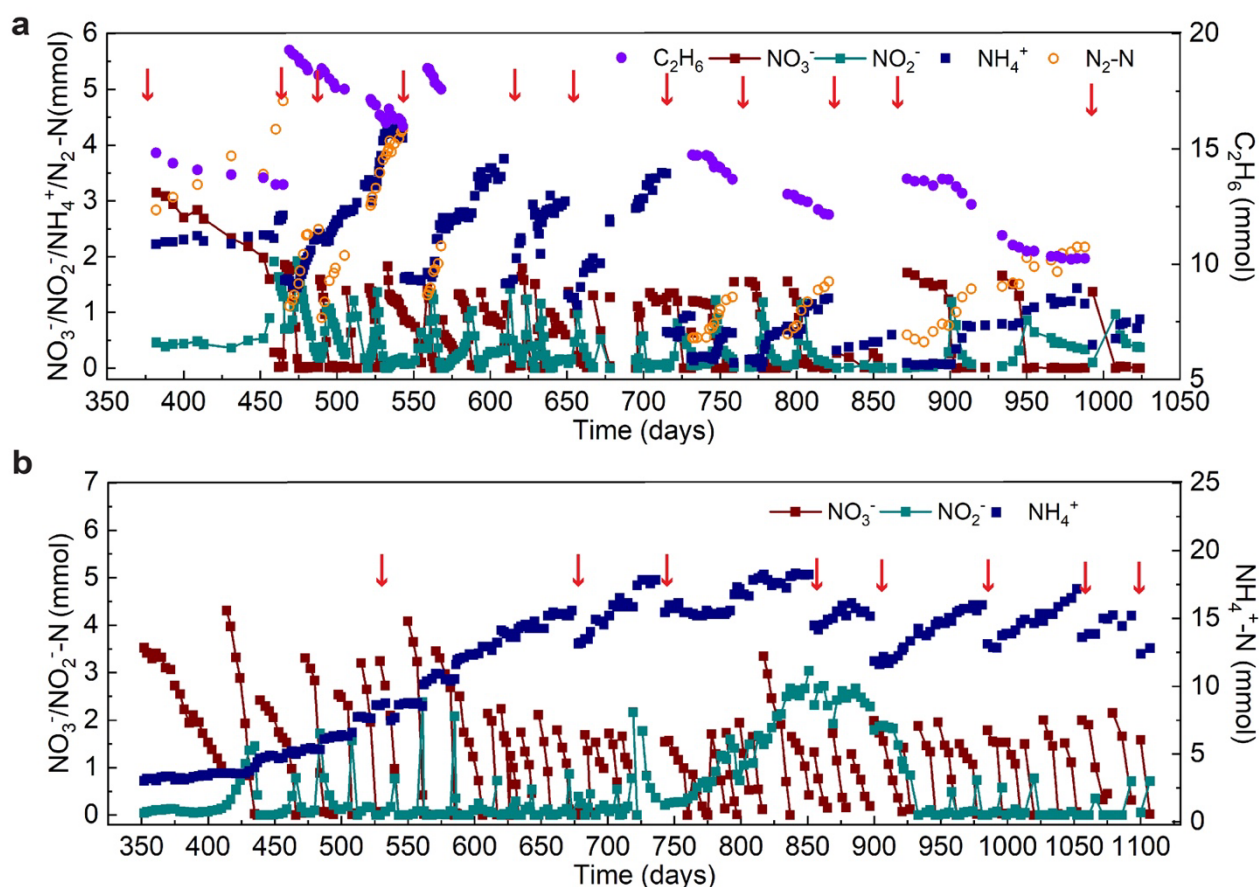

127  
 128 **Supplementary Fig. 1** Long-term performance of the  $\text{C}_2\text{H}_6$ - **(a)** and  $\text{C}_4\text{H}_{10}$ -fed **(b)**  
 129 bioreactors. **(a)** Simultaneous  $\text{C}_2\text{H}_6$  and  $\text{NO}_3^-$  consumption with transitory formation of  $\text{NO}_2^-$ ,  
 130 and production of  $\text{N}_2$  and  $\text{NH}_4^+$  in the  $\text{C}_2\text{H}_6$ -fed bioreactor. **(b)**  $\text{NO}_3^-$  consumption with  
 131 production of  $\text{NH}_4^+$  and transitory formation of  $\text{NO}_2^-$  was also observed in the  $\text{C}_4\text{H}_{10}$ -fed  
 132 bioreactor. Red arrows indicate medium replacements and the flushing of the bioreactor  
 133 headspace with  $\text{C}_2\text{H}_6$  or  $\text{C}_4\text{H}_{10}$ .

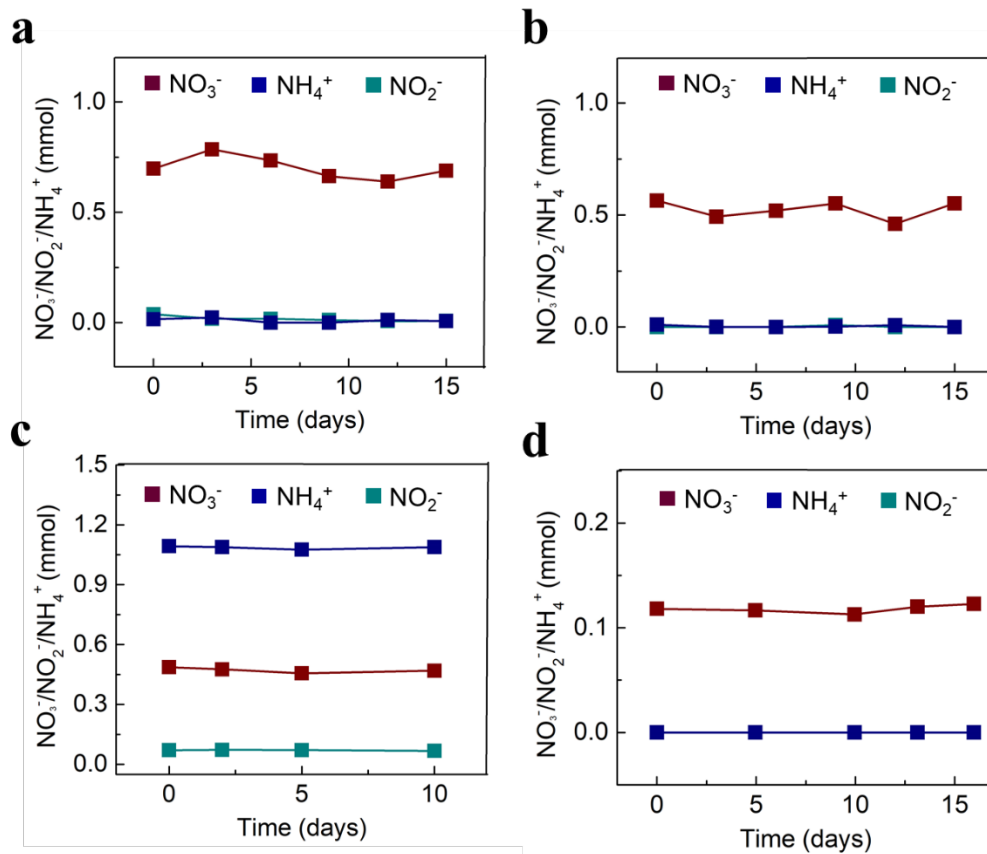

134  
 135 **Supplementary Fig. 2 Profiles of NO<sub>3</sub><sup>-</sup>, NO<sub>2</sub><sup>-</sup> and NH<sub>4</sub><sup>+</sup> in the control tests. a, c, negligible**  
 136 **NO<sub>3</sub><sup>-</sup> consumption or NO<sub>2</sub><sup>-</sup>/NH<sub>4</sub><sup>+</sup> production in the absence of C<sub>2</sub>H<sub>6</sub> (a) or C<sub>4</sub>H<sub>10</sub> (c). b, d,**  
 137 **negligible NO<sub>3</sub><sup>-</sup> consumption or NO<sub>2</sub><sup>-</sup>/NH<sub>4</sub><sup>+</sup> production in the abiotic control (without**  
 138 **biomass) supplied with C<sub>2</sub>H<sub>6</sub> (b) or C<sub>4</sub>H<sub>10</sub> (d).**

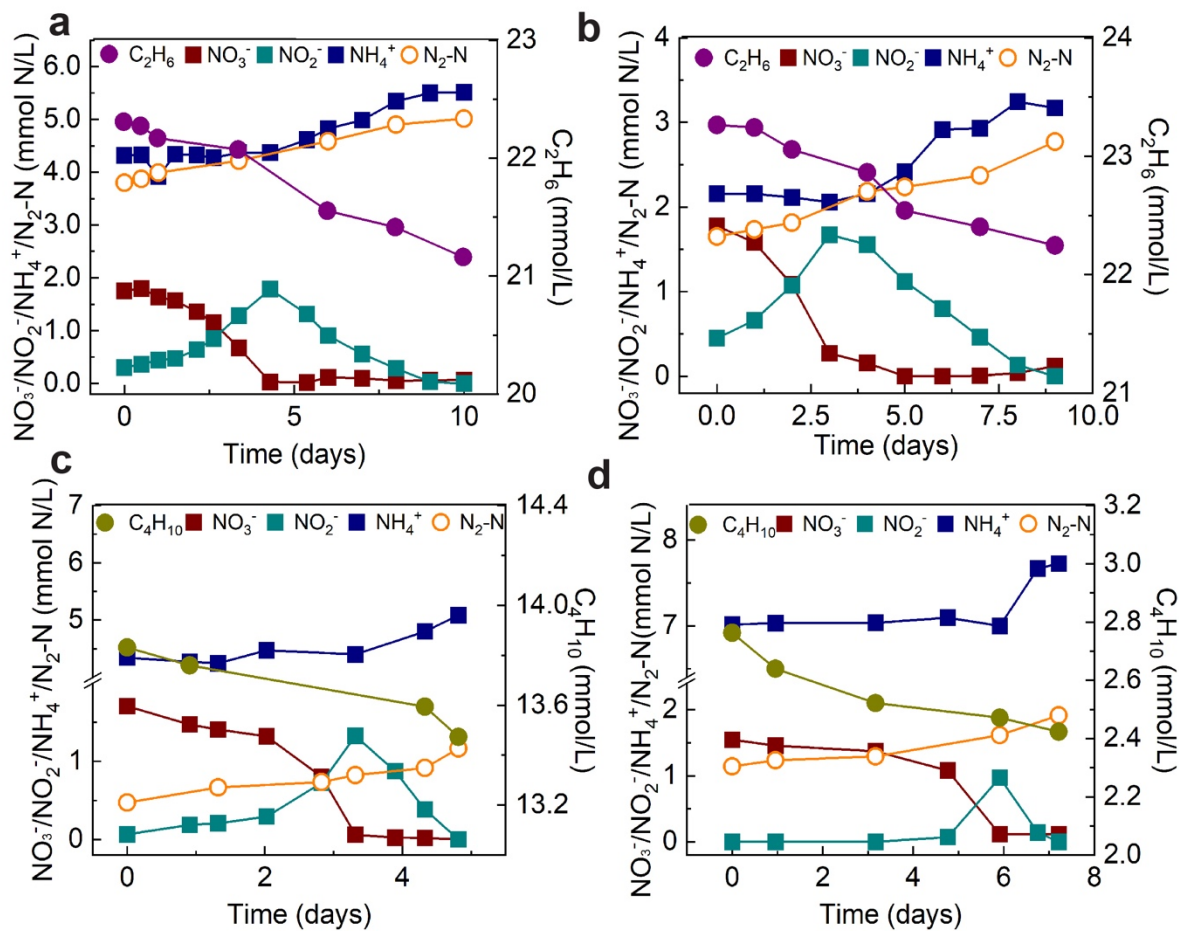

139  
 140 **Supplementary Fig. 3 Profiles of C<sub>2</sub>H<sub>6</sub>, C<sub>4</sub>H<sub>10</sub>, and nitrogen species in the batch tests. a,**  
 141 **b, supplementary batch tests for C<sub>2</sub>H<sub>6</sub>-fed bioreactor (started on Day 522 and 559). c, d,**  
 142 **supplementary batch tests for C<sub>4</sub>H<sub>10</sub>-fed bioreactor (started on Day 1,100 and 1,124).**  
 143

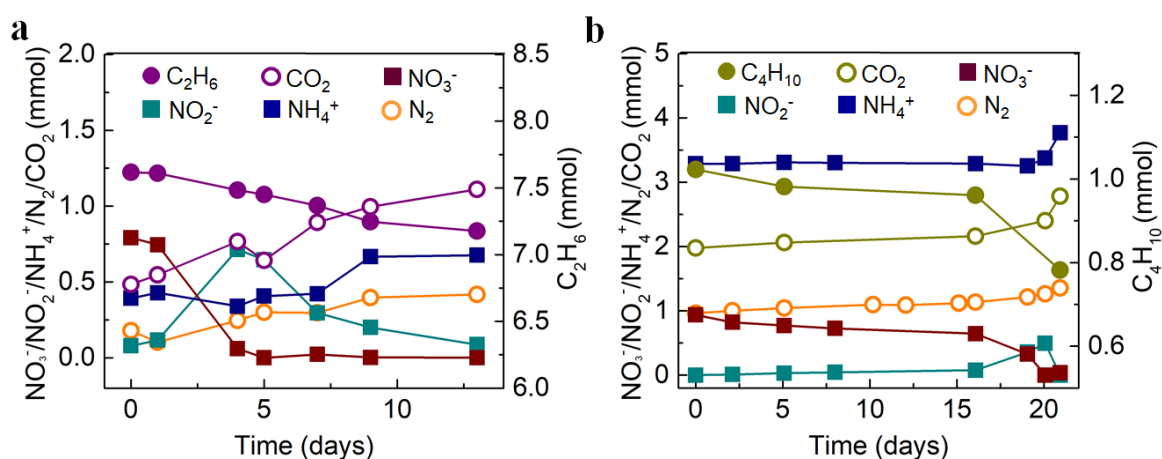

144  
 145 **Supplementary Fig. 4 Profiles of total C<sub>2</sub>H<sub>6</sub>, C<sub>4</sub>H<sub>10</sub>, and nitrogen species during isotope**  
 146 **labelling tests. a, b, oxidation of C<sub>2</sub>H<sub>6</sub> (a) or C<sub>4</sub>H<sub>10</sub> (b) to CO<sub>2</sub>, and reduction of NO<sub>3</sub><sup>-</sup> to**  
 147 **NH<sub>4</sub><sup>+</sup> and N<sub>2</sub> with temporary accumulation of NO<sub>2</sub><sup>-</sup>.**

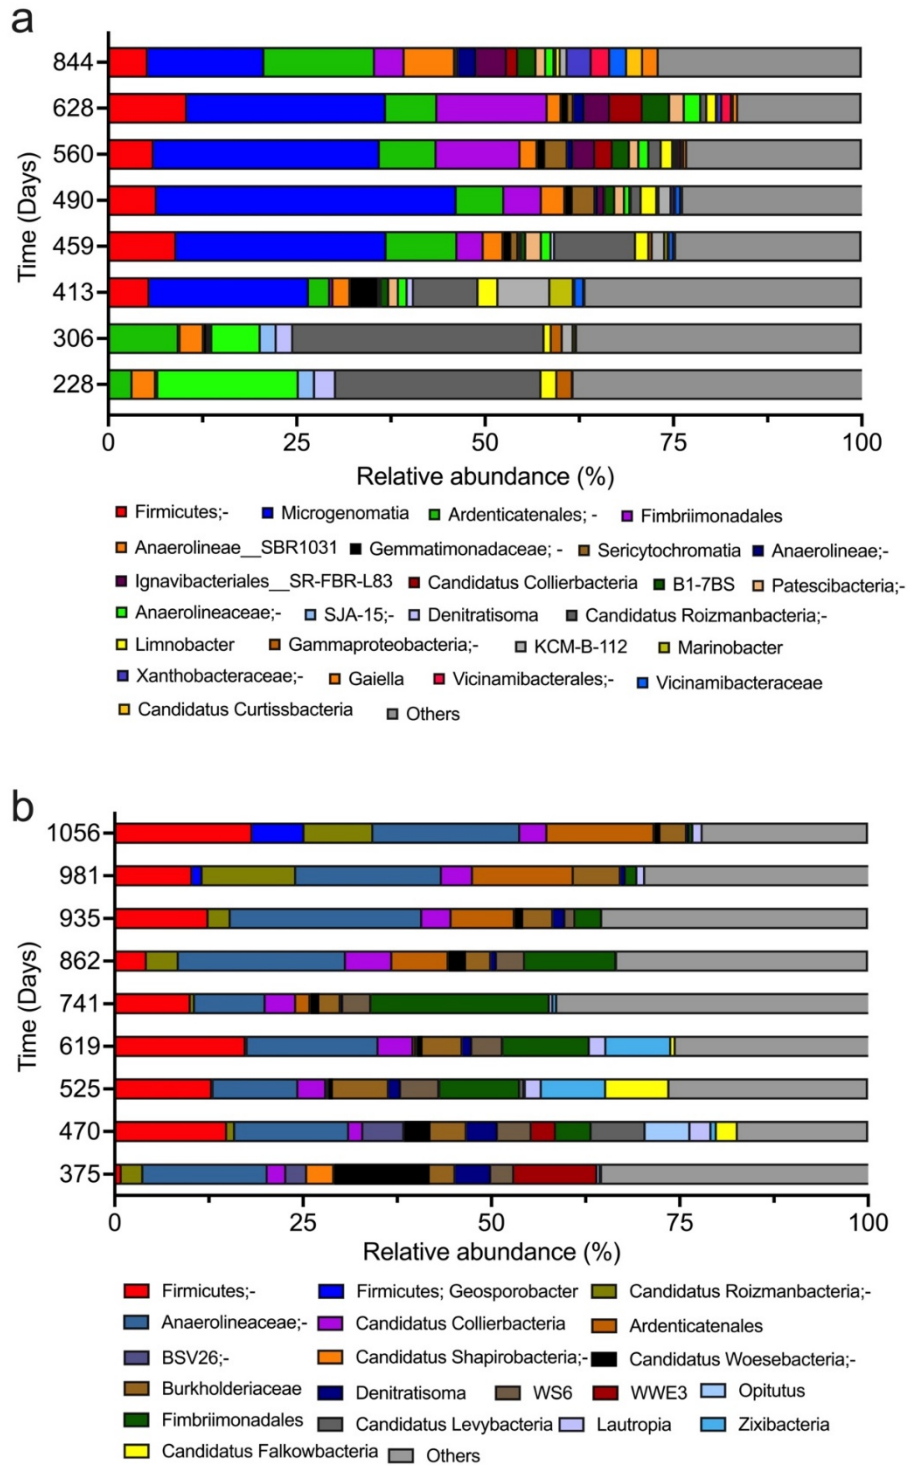

148

149 **Supplementary Fig. 5** Phylotypes in the enrichment cultures at the genus level based on 16S

150 rRNA gene amplicon sequencing during long-term operations of C<sub>2</sub>H<sub>6</sub>- (a) and C<sub>4</sub>H<sub>8</sub>-fed (b)

151 bioreactors. Genera with an abundance of ≥2% in at least one sample are displayed, while

152 genera account for <2% in all samples are classified as ‘Others’.

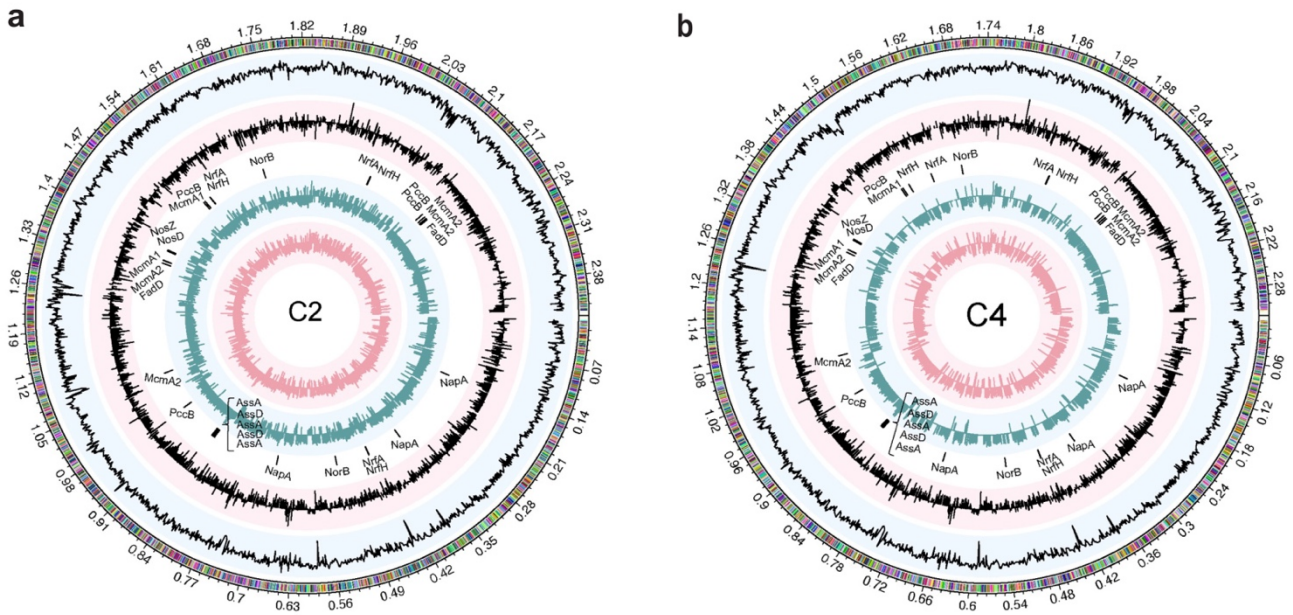

153

154 **Supplementary Fig. 6 Features of recovered Symbiobacteria genomes in C<sub>2</sub>H<sub>6</sub>- (a) and**

155 **C<sub>4</sub>H<sub>8</sub>-fed (b) bioreactors.** Tracks from outside to inside: Track 1 - the genomes and encoded  
 156 genes, Track 2- GC ratio, Track 3 - GC skew, Track 4 - loci of genes involved in nitrogen and

157 ethane/butane conversion, Track 5 and 6 - log-transformed gene TPM values in Phase 1 and  
 158 2. The lines in Track 5 and 6 facing outward and inward indicate the genes encoded on '+'

159 and '-' strand, respectively. Ass, Alkylsuccinate synthase; Fad, long-chain acyl-CoA

160 synthetase; Mcm, Methylmalonyl-CoA mutase; Pcc, Propionyl-CoA carboxylase; Nap,

161 Nitrate reductase; Nrf, Cytochrome *c* 552 nitrite reductase; Nor, Nitric oxide reductase; Nos,

162 Nitrous oxide reductase.



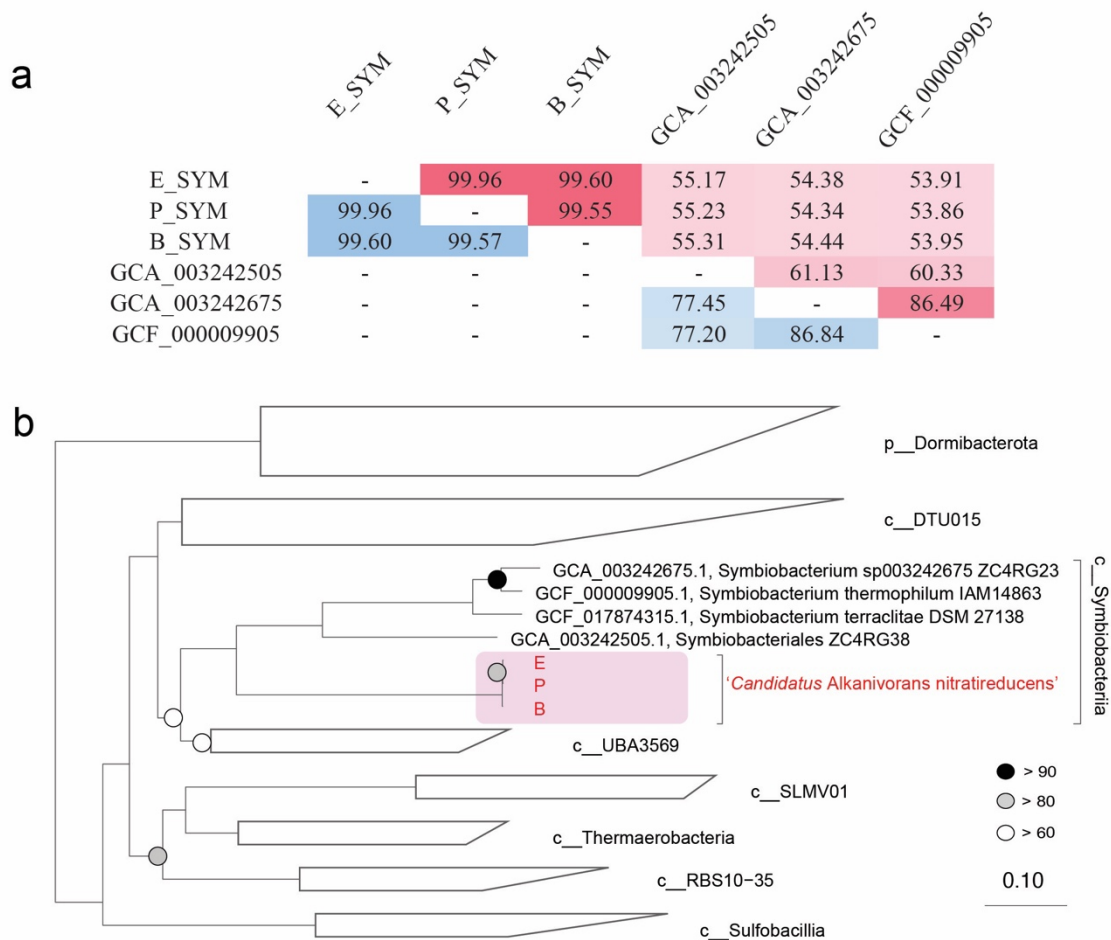

163

164 **Supplementary Fig. 7 Comparative genome analyses of ‘*Ca. A. nitratireducens*’ in the**  
 165  **$C_2H_6$ - and  $C_4H_{10}$ -fed systems, and genome-based phylogenetic tree. (a) ANI and AAI**  
 166 **between the available Symbiobacteriia genomes. All available genomes including**  
 167 **GCA\_003242505.1 (*Symbiobacterium*), GCA\_003242675 (*Symbiobacterium*) and**  
 168 **GCF\_000009905 (*S. thermophilum* IAM 14863) were retrieved from GTDB r202. ANI**  
 169 **values were calculated using FastANI, filled in lower matrix and scaled in blue, AAI values**  
 170 **were calculated using compareM, filled in upper matrix and scaled in red. (b) Genome-based**  
 171 **phylogenetic tree inferred with a concatenated set of 120 bacterial-specific marker genes.**  
 172 **Genomes recovered from  $C_2H_6$ -,  $C_3H_8$ - and  $C_4H_{10}$ -fed bioreactors are highlighted in red text.**  
 173 **Genomes from phylum Dormibacterota are used as outgroup.**

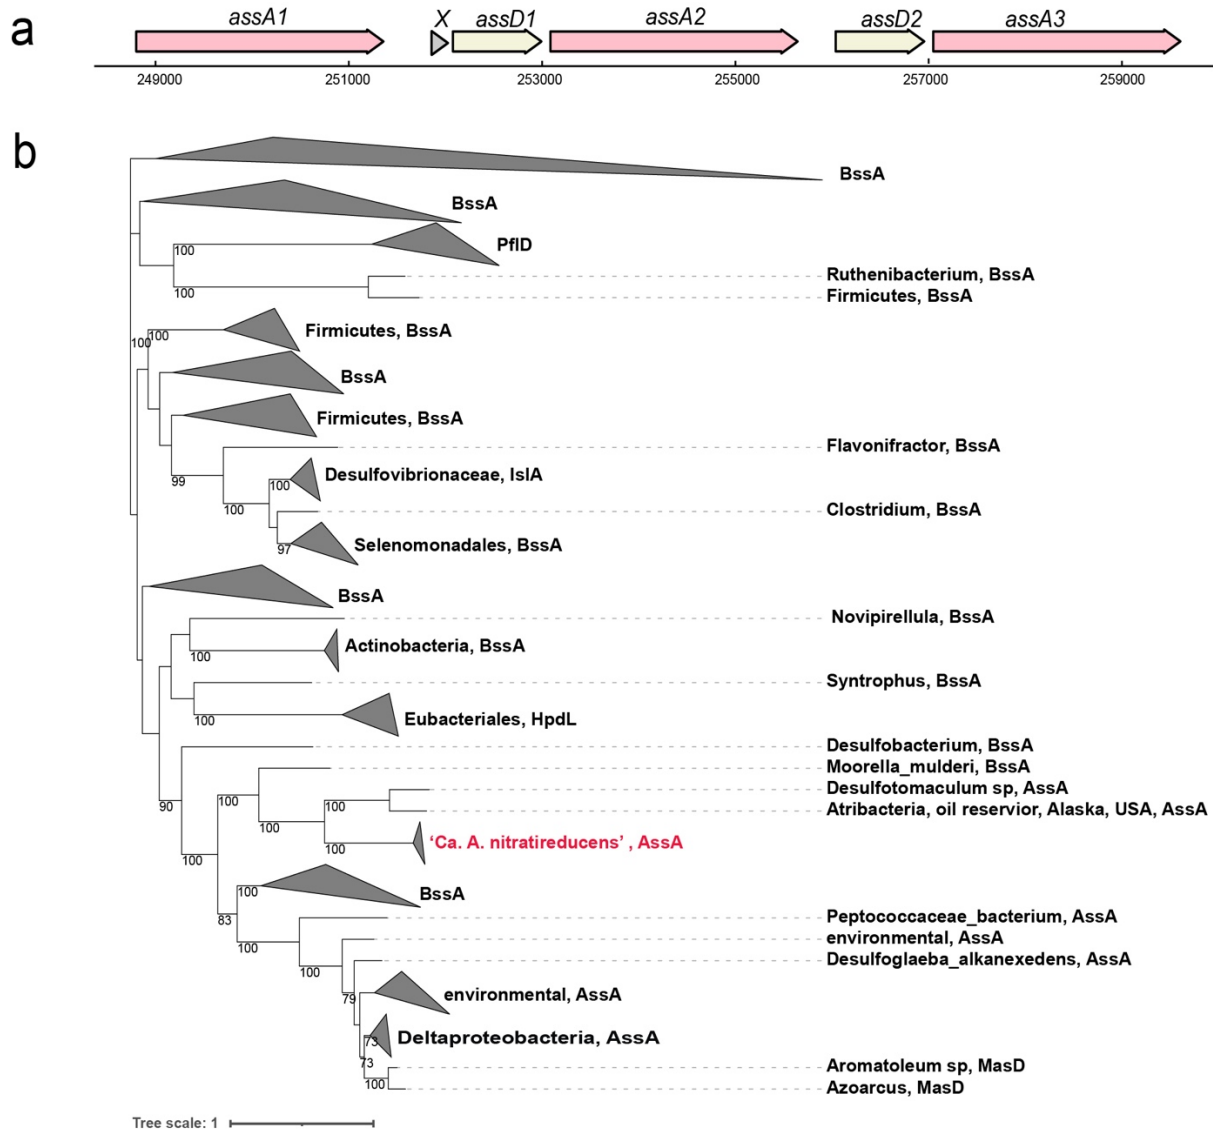

174

175 **Supplementary Fig. 8 The operon and phylogenetic affiliation of alkylsuccinate synthase**

176 **(ASS) in ‘Ca. A. nitratireducens’.** (a) The ASS operon in ‘Ca. A. nitratireducens’ genome

177 recovered from the C<sub>2</sub>H<sub>6</sub>-fed (E) cultures. Similar with E MAG, the genome of ‘Ca. A.

178 nitratireducens’ recovered from the C<sub>4</sub>H<sub>10</sub>-fed cultures also contains three AssA and two

179 AssD subunits. (b) Phylogenetic tree of AssA genes. AssA recovered from the three

180 Symbiobacteria genomes are highlighted in red text. Bootstrap values were determined with

181 100 non-parametric bootstraps, where 70-100 bootstrap values were shown. The scale bar

182 indicates amino acid substitutions per site.

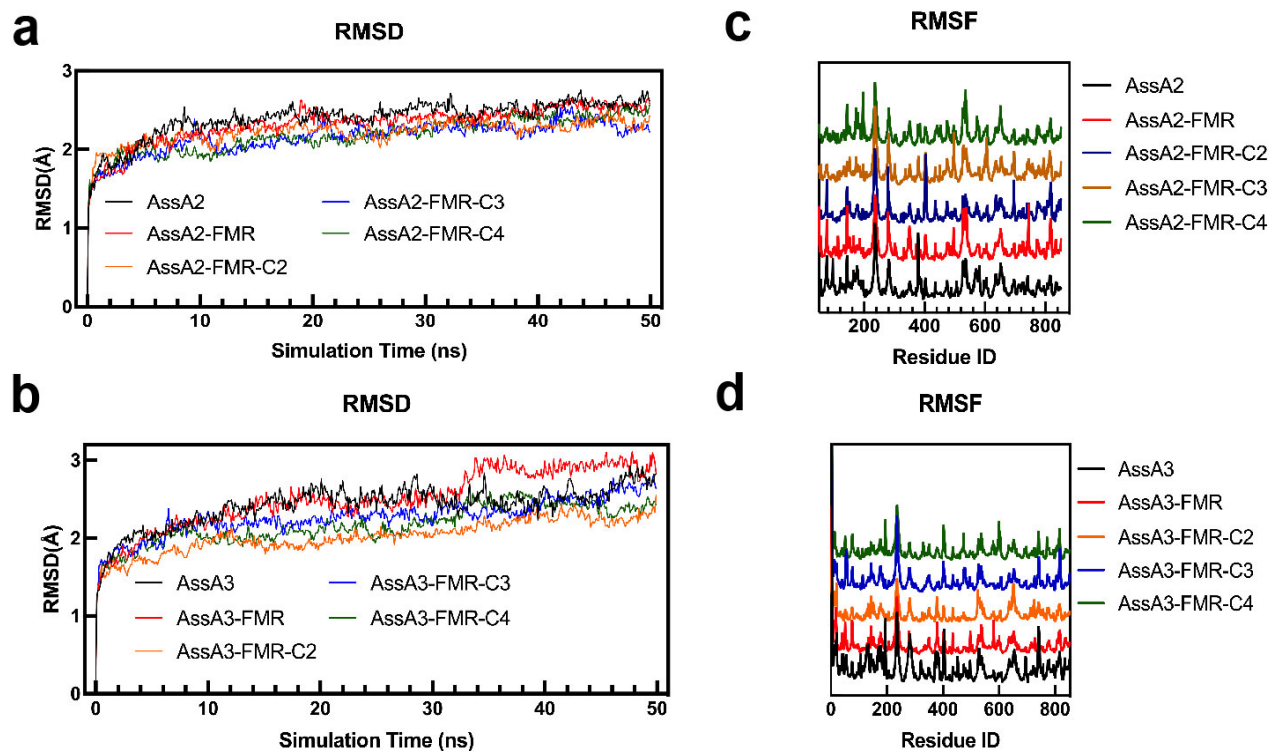

183

184 **Supplementary Fig. 9** The calculations of root mean square deviation (RMSD) and

185 **fluctuation (RMSF) for all molecular dynamics (MD) simulations. a, b, RMSD**

186 **calculations for MD simulations of AssA2 (a) and AssA3 (b). c, d, RMSF calculations for**

187 **MD simulations of AssA2 (c) and AssA3 (d). FMR represents the complex with AssA only**

188 **binding to fumarate, and FMR-C2/C3/C4 means the AssA binds to both fumarate and**

189 **ethane/propane/butane.**

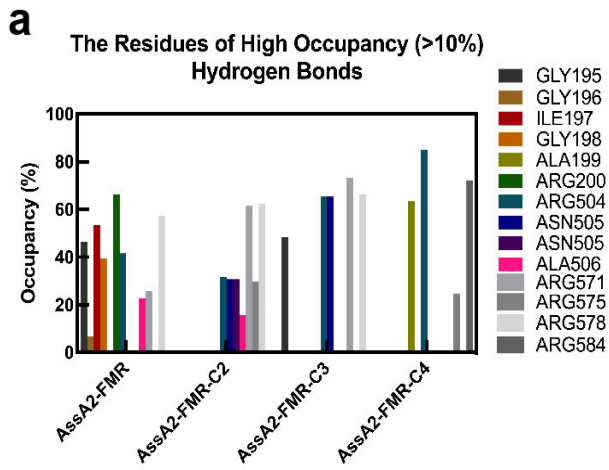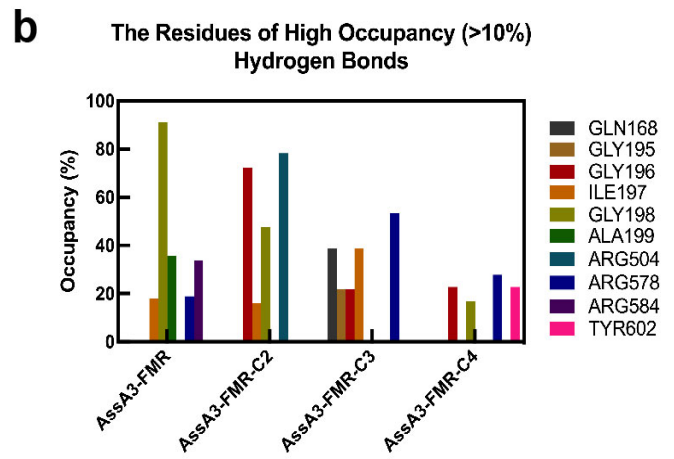

190

191 **Supplementary Fig. 10 The amino acid residues with occupancy of hydrogen bonds >**

192 **10% in AssA2 (a) and AssA3 (b) in 'Ca. A. nitratireducens'.**

193

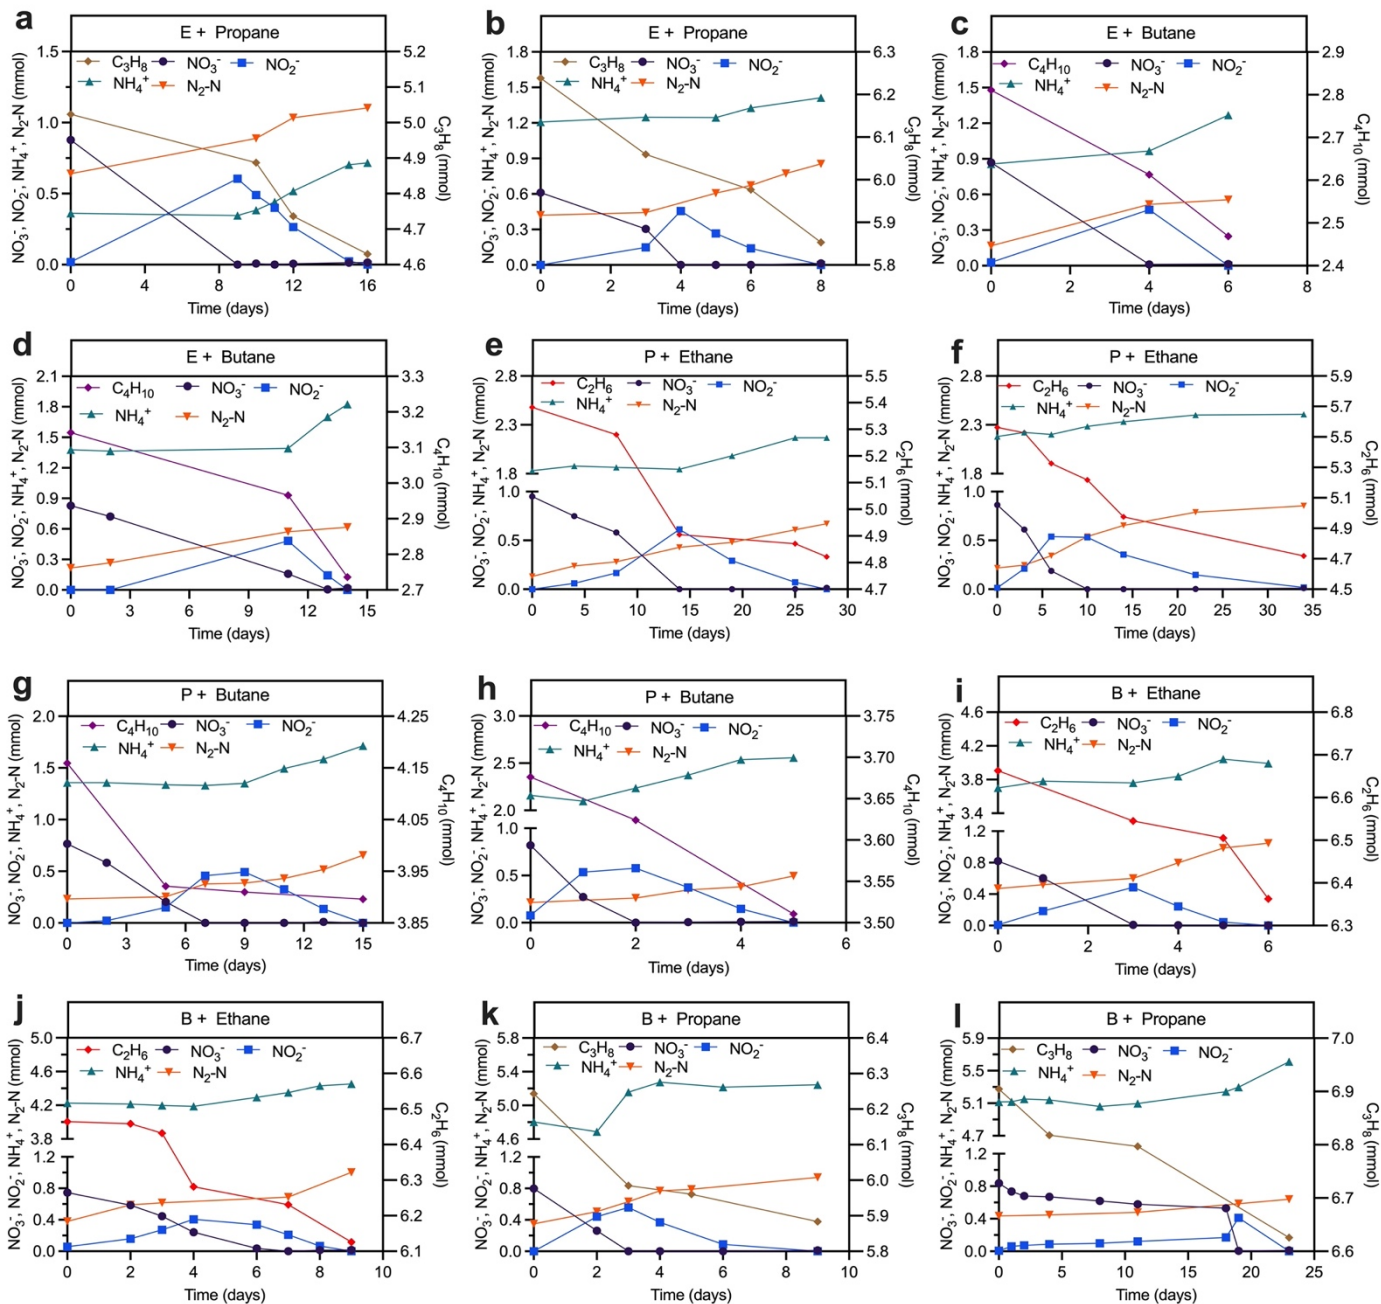

194 **Supplementary Fig. 11 Profiles of C<sub>2</sub>H<sub>6</sub>, C<sub>3</sub>H<sub>8</sub>, C<sub>4</sub>H<sub>10</sub>, and nitrogen species in the**  
 195 **substrate range tests for ‘Ca. A. nitratireducens’.**

196

197 1 Wu, M. *et al.* Anaerobic oxidation of propane coupled to nitrate reduction by a  
 198 lineage within the class Symbiobacteriia. *Nature Communications* **13**, 6115 (2022).

199 2 Parks, D. H. *et al.* A complete domain-to-species taxonomy for Bacteria and Archaea.  
 200 *Nat Biotechnol* **38**, 1079-1086 (2020).

201 3 Parks, D. H. *et al.* A standardized bacterial taxonomy based on genome phylogeny  
 202 substantially revises the tree of life. *Nat Biotechnol* **36**, 996-1004 (2018).

203 4 Hyatt, D. *et al.* Prodigal: prokaryotic gene recognition and translation initiation site  
 204 identification. *BMC Bioinformatics* **11**, 119 (2010).

205 5 Eddy, S. R. Accelerated profile HMM searches. *PLoS Comput Biol* **7**, e1002195 (2011).  
206 6 Price, M. N., Dehal, P. S. & Arkin, A. P. FastTree 2--approximately maximum-  
207 likelihood trees for large alignments. *PLoS One* **5**, e9490 (2010).  
208 7 Ludwig, W. *et al.* ARB: a software environment for sequence data. *Nucleic Acids Res*  
209 **32**, 1363-1371 (2004).  
210 8 Edgar, R. C. MUSCLE: multiple sequence alignment with high accuracy and high  
211 throughput. *Nucleic acids research* **32**, 1792-1797 (2004).  
212 9 Capella-Gutiérrez, S., Silla-Martínez, J. M. & Gabaldón, T. trimAl: a tool for  
213 automated alignment trimming in large-scale phylogenetic analyses. *Bioinformatics*  
214 **25**, 1972-1973 (2009).
